# Supplementary material
Source: PubMed Central journal article supplement (PMC7450519)
Supplement: NIHMS1618700-supplement-Supplement.pdf [file NIHMS1618700-supplement-Supplement.pdf]

# Characterization and Control of Dynamic Rearrangement in a Self-Assembled Antibody Carrier

*Anshul Dhankher, Manuel E. Hernandez, Hannah C. Howard, Julie A. Champion\**

School of Chemical & Biomolecular Engineering and Petit Institute for Bioengineering and  
Bioscience, Georgia Institute of Technology, Atlanta, Georgia 30332, United States

## SUPPORTING INFORMATION

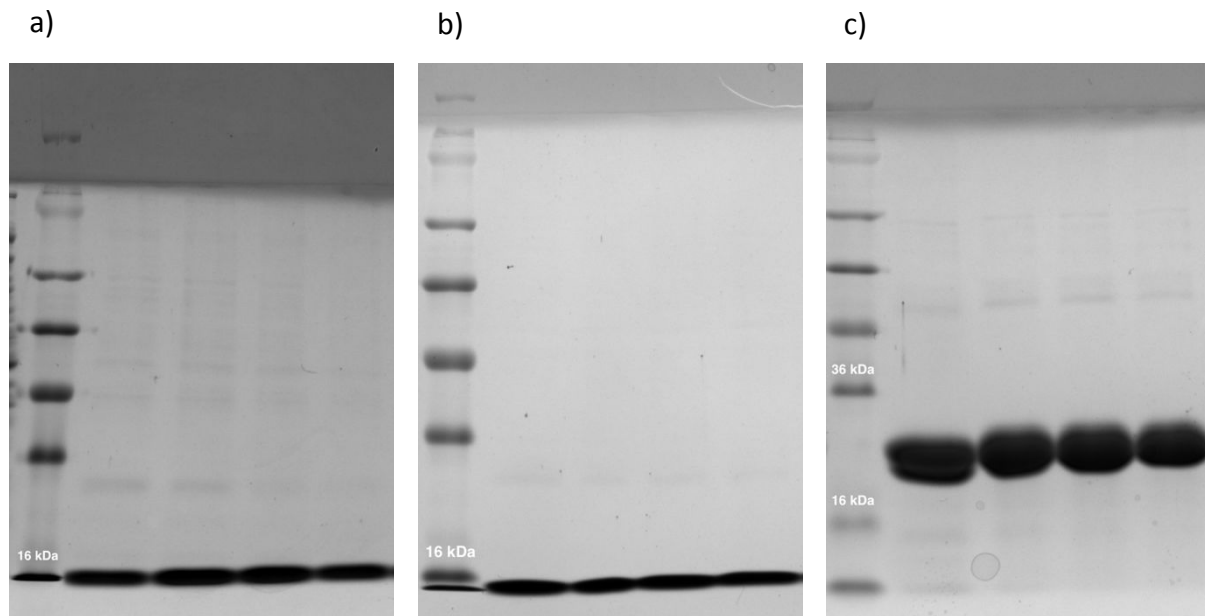

Supporting Figure S1. SDS-PAGE analysis of purified elutions for Hex SPAB (a) SPAB Hex (b) and SPAB Hex SPAB (c) proteins. The protein standard ladder, with relevant molecular weights indicated, is in the leftmost lane of each gel.

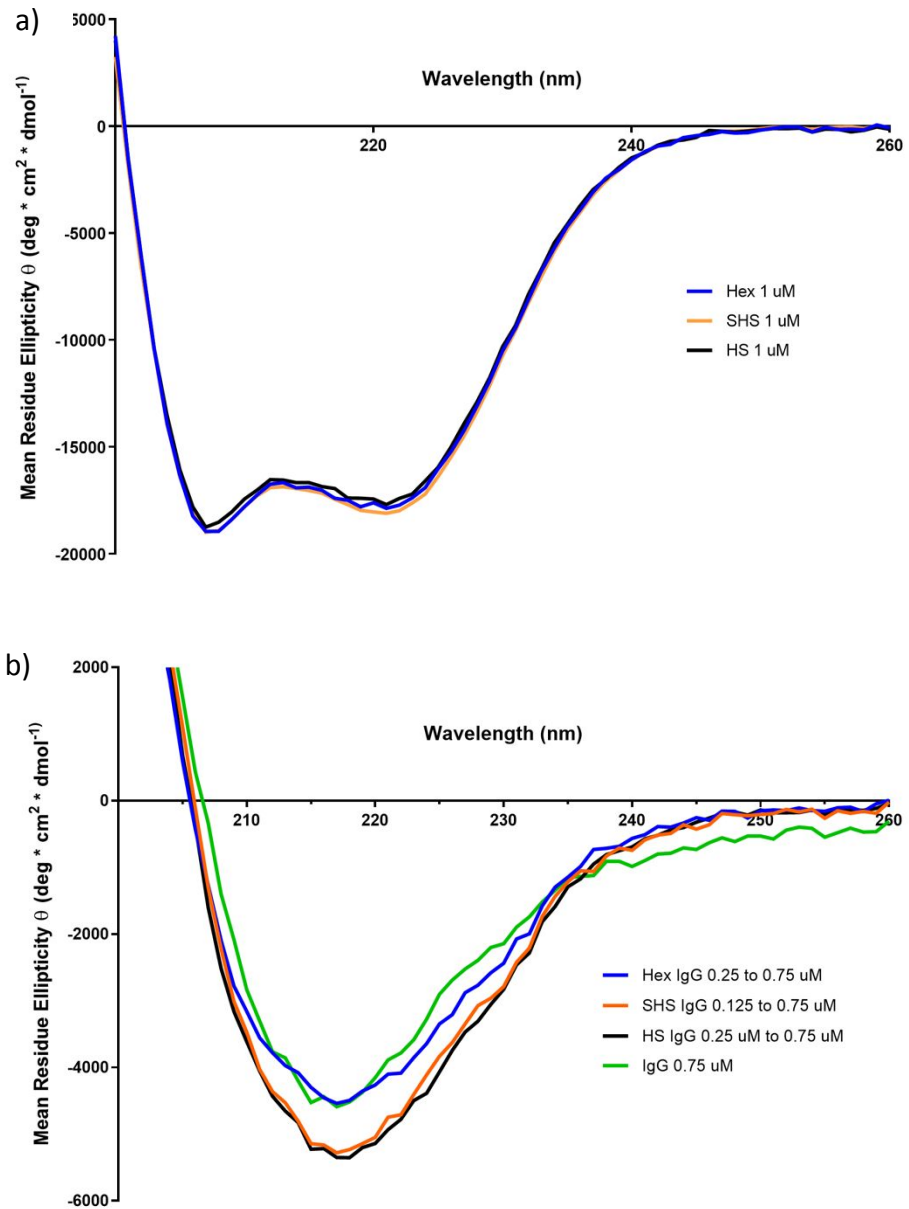

Supporting Figure S2. CD analysis of (a) Hex, SHS, and HS alone and (b) 1:3 Hex-IgG, 1:6 SHS-IgG, 1:3 HS-IgG, and IgG.

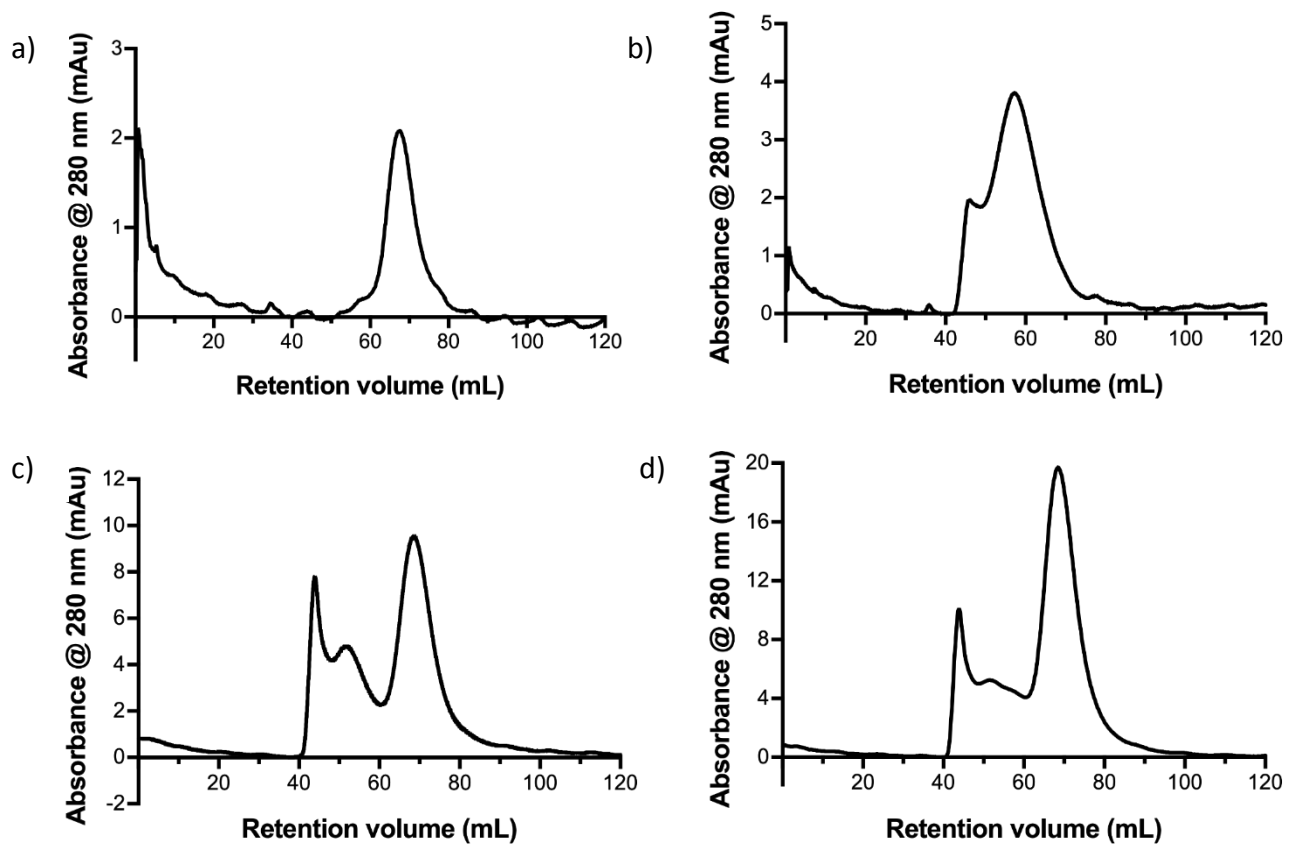

Supporting Figure S3. SEC analysis of IgG (a), Hex-IgG in 1 to 2 (b), 1 to 6 (c) and 1 to 12 (d) ratios.

a)

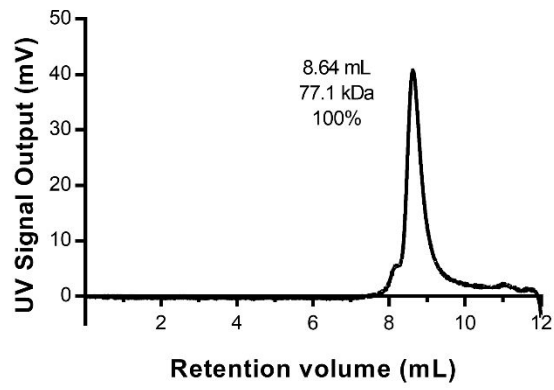

b)

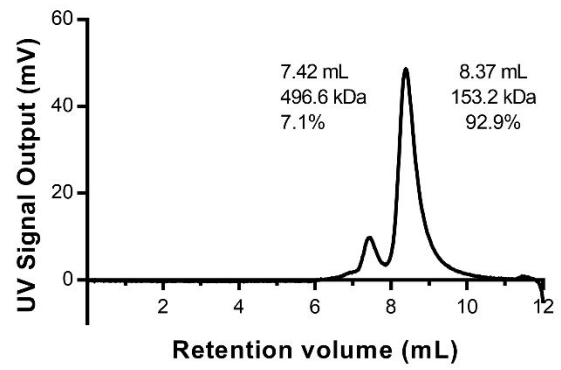

Supporting Figure S4. OmniSEC chromatogram and analysis for Hex control (a) and IgG control (b).

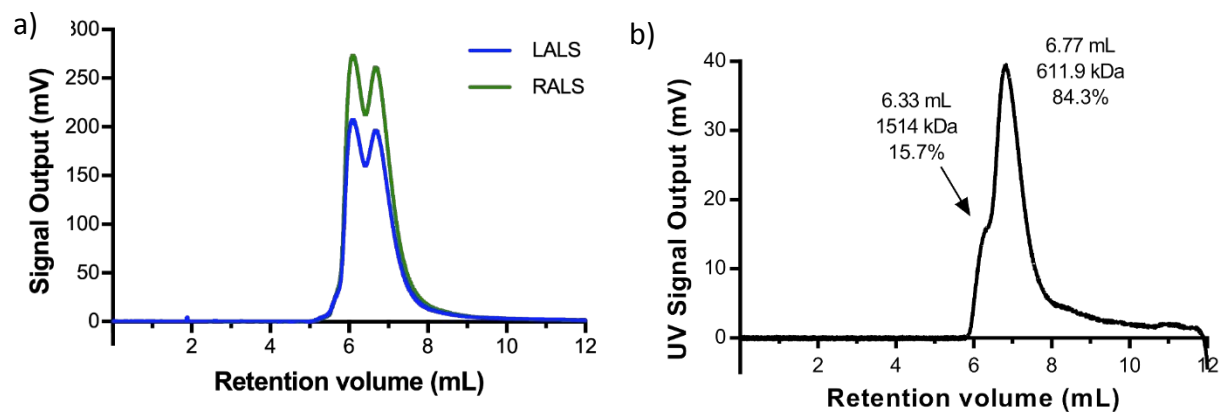

Supporting Figure S5. (a) OmniSEC chromatogram of RALS and LALS output for Hex-IgG sample incubated at room temperature for 1 week. (b) Reprint of Figure 6b showing OmniSEC chromatogram and analysis for Hex-IgG sample at RT for 1 week. Using our peak detection methodology, the shoulder on the UV chromatogram was considered a peak due to two distinct peaks detected by the RALS/LALS signal.

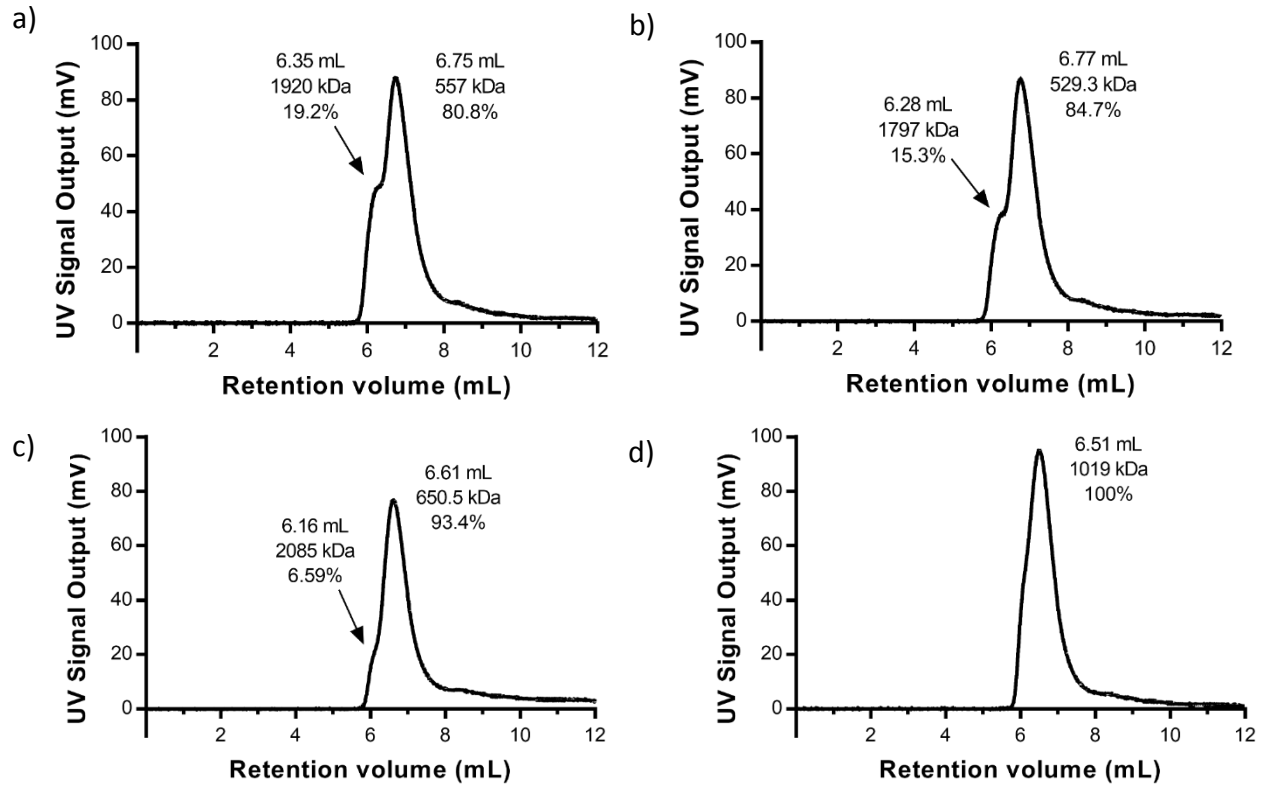

Supporting Figure S6. OmniSEC chromatogram and analysis for Hex-IgG samples stored at 37°C for 10 hrs (a) and 21 hrs (b), and for SHS-IgG samples stored at 37°C for 21 hrs (c) and 48 hrs (d)

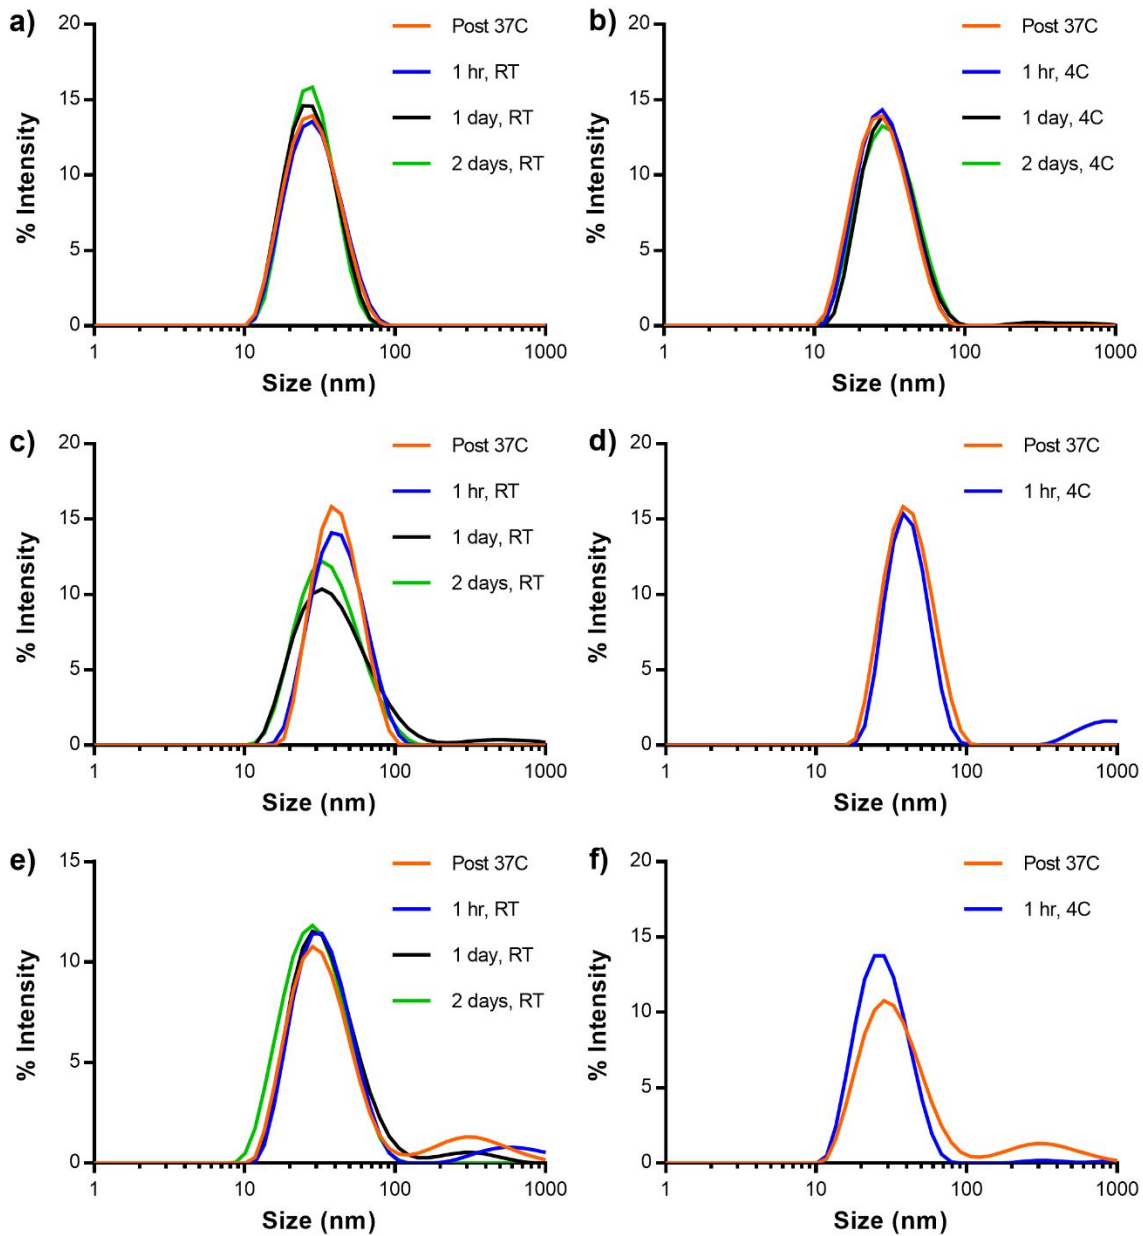

Supporting Figure S7. DLS analysis for Hex-IgG samples stored at 37°C for 18 hrs, then incubated at 25°C (a) and 4°C (b) up to 2 days, and for SHS-IgG samples stored at 37°C for 18 hrs, then incubated at 25°C (c) and 4°C (d) up to 2 days, and for HS-IgG samples stored at 37°C for 18 hours, then incubated at 25°C (e) and 4°C (f) up to 2 days.
